# Supplementary material for: Interactions of Janus Green B with double stranded DNA and the determination of DNA based on the measurement of enhanced resonance light scattering
Source: Royal Society of Chemistry journal article supplement (doi:10.1039/b001662o), 2000-01-01
Supplement: figure.doc [file figure.doc]

**Supplementary Figure.** The deviation of JGB absorption from Beer’s law. pH, 6.37; Ionic strength, 0.006. All the absorbance data were obtained at 20 0C by using the peak selection function of U-3400 spectrophotometer to decide the maximum characteristic wavelength with JGB concentration increasing from 1.0105 to 1.2104 M.
