# Supplementary material for: Interactions of Janus Green B with double stranded DNA and the determination of DNA based on the measurement of enhanced resonance light scattering
Source: Royal Society of Chemistry journal article supplement (doi:10.1039/b001662o), 2000-01-01
Supplement: tables.doc [file tables.doc]

**Supplementary Table 1.** Spectral characteristics of the interaction of JGB with ctDNA

| *C*DNA / 105 M | *R* | **1/ nm | A(1) | **2/ nm | A(2) |
| --- | --- | --- | --- | --- | --- |
| 0.0 | / | 396.6 | 0.2412 | 603.8 | 0.5786 |
| 0.6 | 3.33 | 396.3 | 0.2545 | 592.6 | 0.5039 |
| 1.2 | 1.67 | 396.2 | 0.2580 | 579.5 | 0.4395 |
| 9.0 | 0.22 | 395.9 | 0.2565 | 572.5 | 0.4535 |
| 30.0 | 0.067 | 396.8 | 0.2582 | 584.3 | 0.4585 |
| 75.0 | 0.027 | 397.9 | 0.2345 | 616.0 | 0.4517 |

Concentration of JGB= 2.010-5 M. pH 6.37, ionic strength 0.006. All the data were obtained at 20 0C by using the peak selection function of U-3400 spectrophotometer.

**Supplementary Table 2.** Wavelength shifts of the characteristic wavelength with increasing JGB concentration

| *c*JGB / 105 M | **1/ nm | A(1) | **2/ nm | A(2) |
| --- | --- | --- | --- | --- |
| 1.0 | 396.8 | 0.1119 | 603.8 | 0.2973 |
| 2.0 | 395.8 | 0.2209 | 599.0 | 0.5879 |
| 4.0 | 396.2 | 0.4425 | 596.8 | 1.1773 |
| 6.0 | 396.2 | 0.6936 | 593.9 | 1.8371 |
| 8.0 | 395.8 | 0.9263 | 593.9 | 2.4244 |
| 10.0 | 396.5 | 1.1053 | 592.3 | 2.8789 |
| 12.0 | 395.5 | 1.3368 | 595.8 | 3.3661 |

pH 6.37, ionic strength 0.006. All the data were obtained at 20 0C by using the peak selection function of U-3400 spectrophotometer.
